# Supplementary material for: Ultrasensitive enzyme-free fluorescent detection of VEGF165 based on target-triggered hybridization chain reaction amplification
Source: Royal Society of Chemistry journal article supplement (doi:10.1039/c8ra04721a), 2018-01-01
Supplement: c8ra04721a1.pdf [file c8ra04721a1.pdf]

## Supporting Information

**Table S1.** Sequences of the oligonucleotides used in this work<sup>a</sup>

| Name | Sequence ( 5' – 3' )                                                                        |
|------|---------------------------------------------------------------------------------------------|
| Hp   | <u>CTGGAAGACGGAAGCCAAACCA</u> <i>AAAAAAAAAA</i> <u>CCGTCTTCCAGACAAGA</u><br><b>GTGCAGGG</b> |
| Hp1  | FAM— <u>TGGTTTGGCTTCCGTCTTCCAG</u> TAGTAGAGGGTCTGGAAGACGG                                   |
| Hp2  | <u>CTGGAAGACGGAAGCCAAACCA</u> CCGTCTTCCAGACCCTCTACTA—FAM                                    |

<sup>a</sup> In Hp, the boldface letters red represent the VEGF<sub>165</sub> recognition sequences, and the letters in italic represent the sequences of the spacer DNA between the VEGF<sub>165</sub> aptamer and E-DNA. The Hp1 on the 5' terminal was labeled with a fluorophore carboxy fluorescein (FAM), and the Hp2 on the 3' terminal was labeled with a FAM. The blue letters in Hp, Hp1 and Hp2 represent the sequences complementary to each other, respectively, and the black letters in Hp1 and Hp2 represent the sequences complementary to each other.

### Optimization of pH and reaction temperature

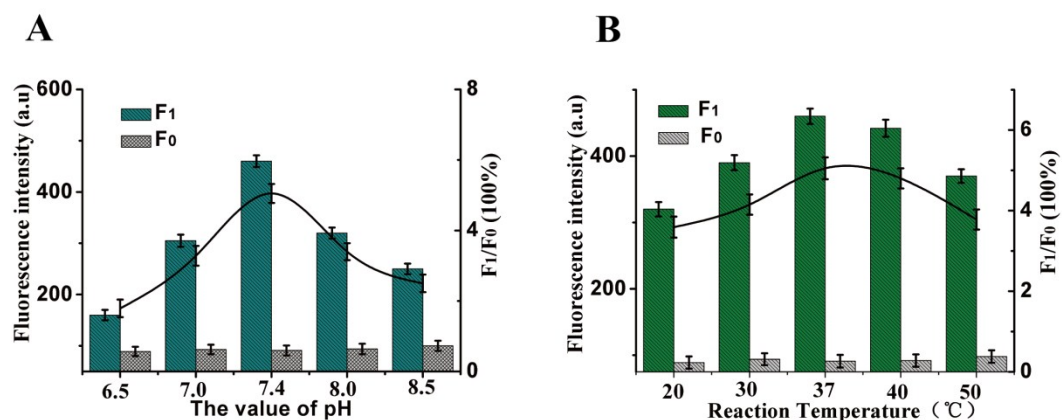

**Fig. S1.** The effect of pH and reaction temperature on the fluorescence intensity at the emission wavelength of 519 nm. The concentrations of Hp1, Hp2, Hp, GO and target (VEGF<sub>165</sub>) were 30nM, 30nM, 5nM, 20  $\mu\text{g}\cdot\text{mL}^{-1}$  and 10  $\text{ng}\cdot\text{mL}^{-1}$ , respectively. Error bars: SD, n=3.

## Optimization of Hp1 and Hp

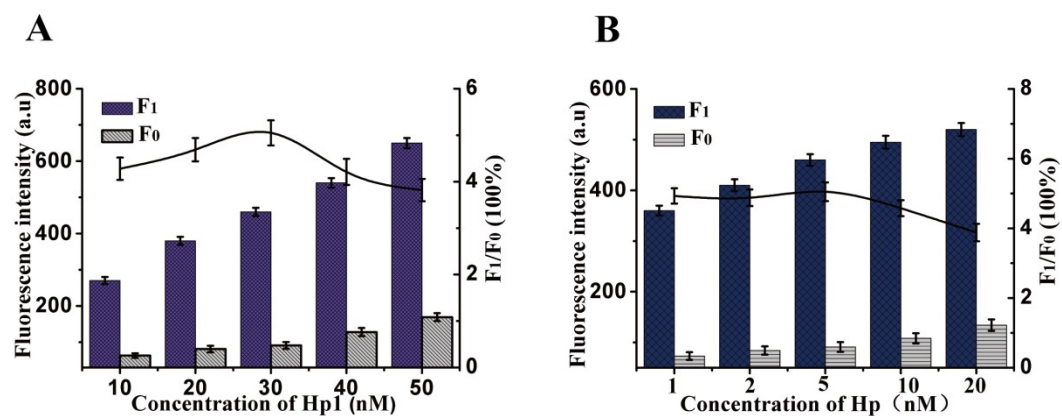

**Fig. S2.** The effect of Hp1 and Hp on the fluorescence intensity at the emission wavelength of 519 nm. The concentrations of GO and target (VEGF<sub>165</sub>) were 20  $\mu\text{g}\cdot\text{mL}^{-1}$  and 10  $\text{ng}\cdot\text{mL}^{-1}$ , respectively. The concentrations of Hp2 are identical Hp1, Error bars: SD, n=3.
